# Supplementary material for: One-step reactivity-driven synthesis of core–shell structured electrically conducting particles for biomedical applications
Source: Royal Society of Chemistry journal article supplement (doi:10.1039/c6tb00642f), 2016-01-01
Supplement: c6tb00642f1.pdf [file c6tb00642f1.pdf]

Supporting Information for

**One-step reactivity-driven synthesis of core–shell  
structured electrically conducting particles for  
biomedical applications**

Jifu Mao and Ze Zhang\*

Centre de recherche du CHU de Québec, Département de chirurgie, Faculté de médecine,  
Université Laval, Québec (QC), Canada

Correspondence to: Ze Zhang

Centre de recherche Hôpital Saint-François d'Assise, CHU, 10 rue de l'Espinay,

Local E00-177, Québec (QC), G1L 3L5, Canada.

E-mail: Ze.Zhang@chg.ulaval.ca

Tel: (418) 525-4416

Fax: (418) 525-4372

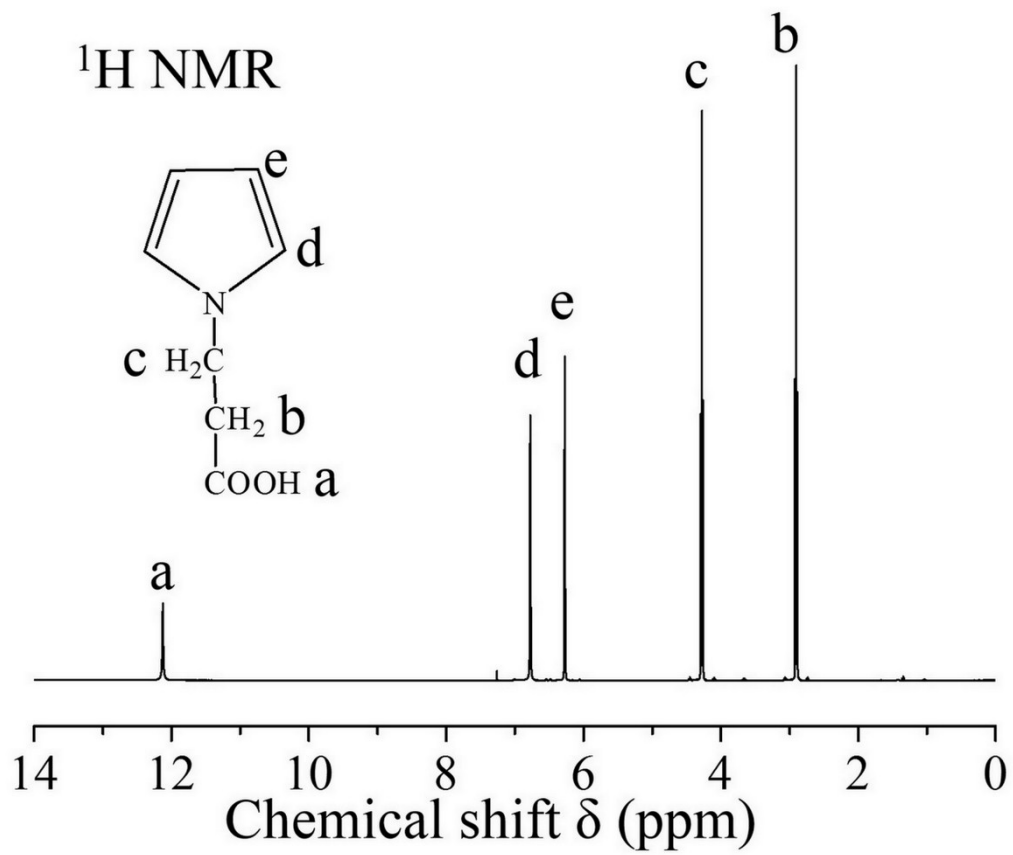

**Figure S1** <sup>1</sup>H NMR (400 MHz, CDCl<sub>3</sub>) result of 1-(2-Carboxyethyl)pyrrole.

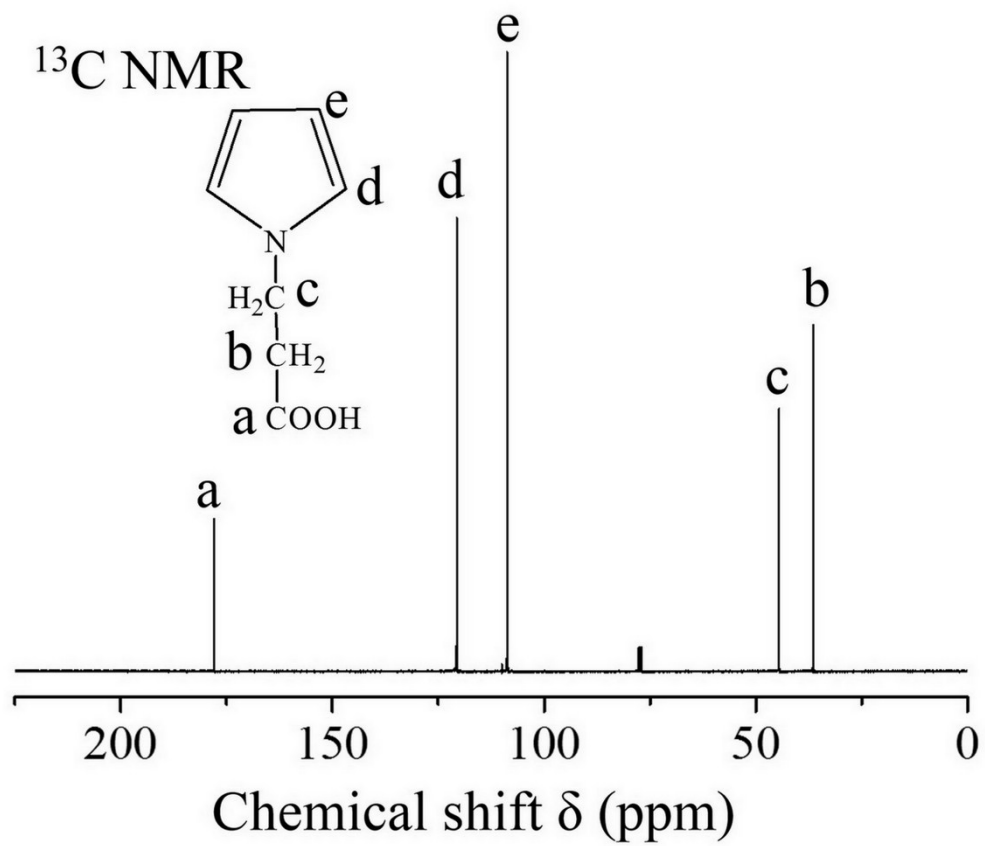

**Figure S2** <sup>13</sup>C NMR (100 MHz, CDCl<sub>3</sub>) result of 1-(2-Carboxyethyl)pyrrole.

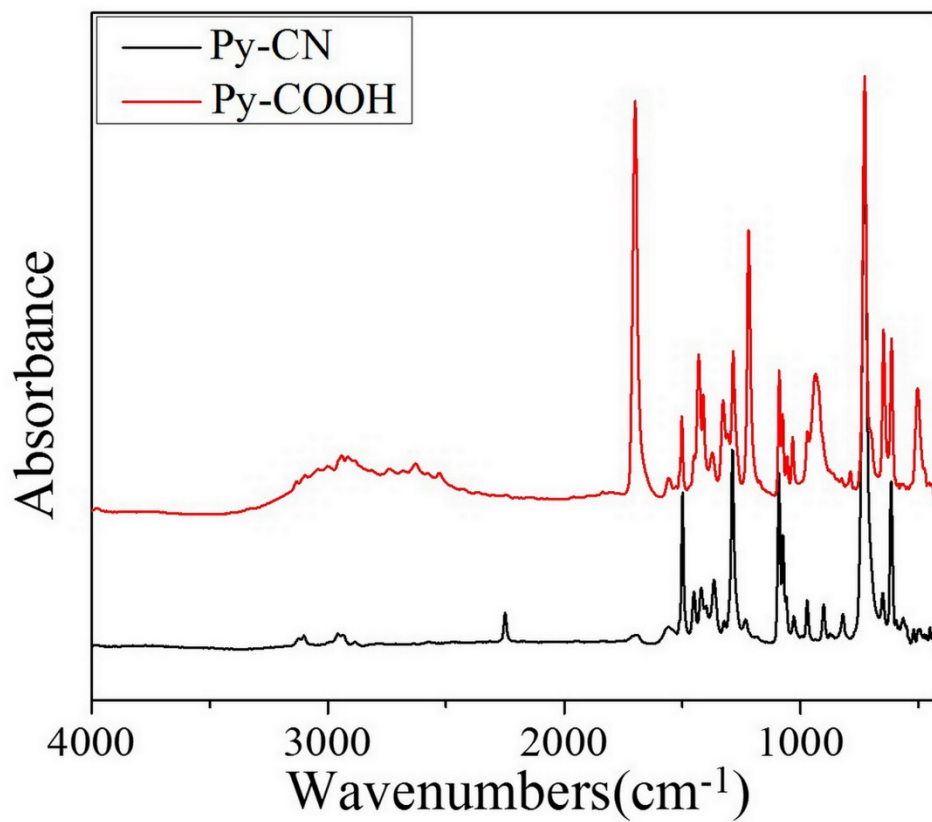

**Figure S3** FTIR spectra of 1-(2-Carboxyethyl)pyrrole and 1-(2-cyanoethyl)pyrrole.

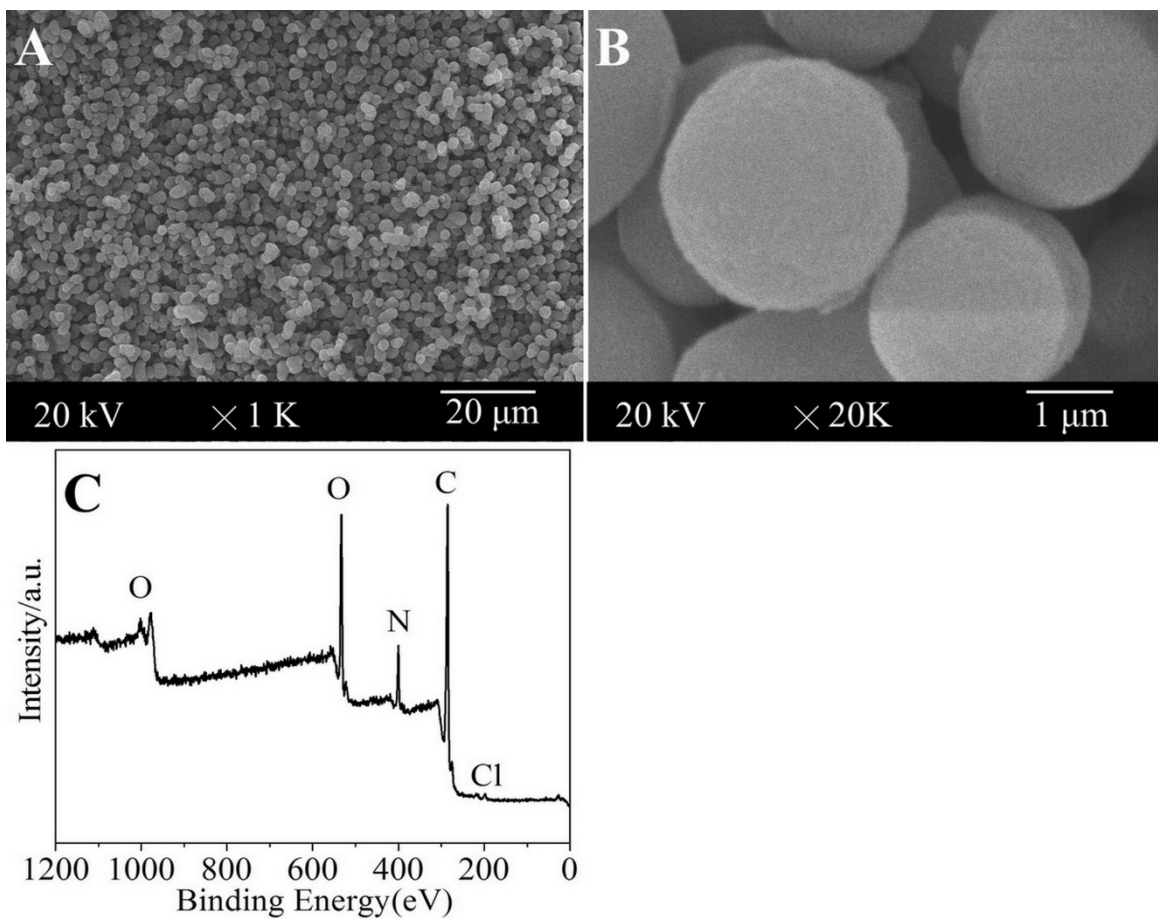

**Figure S4** SEM photomicrographs and XPS spectra of PPy-COOH polymer obtained from filtrate of reaction for 12h: (A-B) SEM photos, (C) Full XPS spectra.
